# Supplementary material
Source: publisher figshare collection journal article supplement (https://geolsoc.figshare.com/ndownloader/files/14413304)
Supplement: Supplementary file 1 [file 14413304]

## Sheet: Sheet1
Table ES5. Ch13 Kaka Point Structural Belt tuffaceous sediments ICP-MS
	NZ17-6	NZ17-7	NZ17-8	NZ17-12	NZ17-13	NZ17-14	NZ17-15
Group	Wiillsher Gp.	Wiillsher Gp.	Wiillsher Gp.	Wiillsher Gp.	Wiillsher Gp.	Wiillsher Gp.	Wiillsher Gp.
Area	Kaka Point Structural Belt	Kaka Point Structural Belt	Kaka Point Structural Belt	Kaka Point Structural Belt	Kaka Point Structural Belt	Kaka Point Structural Belt	Kaka Point Structural Belt
GPS	59G 04 06428 UTM 48 62665	59G 04 06428 UTM 48 62665	59G 04 06428 UTM 48 62665	59G 04 06459 UTM 48 63384	59G 04 06502 UTM 48 63555	59G 04 06425 UTM 48 62311	59G 04 06485 UTM 48 62407
	1	1	1	1	1	1	1
	1	1	1	1	1	1	1
SiO2	74.28	59.8	70.71	77.01	75.36	75.22	70.53
Al2O3	13.05	17.27	14.02	10.83	12.27	12.64	14.08
Fe2O3	2.27	5.09	3.07	1.09	0.63	1.59	1.68
MgO	0.63	1.91	0.68	0.28	0.21	0.63	0.33
CaO	1.46	1.73	1.46	0.23	0.32	0.83	1.59
Na2O	3.11	3.64	4.01	5.23	5.94	5.4	6.51
K2O	3.11	2.88	2.47	0.12	0.34	0.29	0.28
TiO2	0.61	0.71	0.51	0.26	0.29	0.27	0.51
P2O5	0.07	0.16	0.07	0.04	0.05	0.06	0.14
MnO	0.03	0.06	0.03	0.02	<0.01	0.03	0.1
Cr2O3	0.003	<0.002	<0.002	<0.002	<0.002	<0.002	<0.002
Ba	420	1701	337	56	110	169	84
Ni	<20	<20	<20	<20	<20	<20	<20
Sc	9	14	11	7	6	6	10
LOI	1.2	6.4	2.8	4.7	4.5	2.9	4.1
Sum	99.89	99.82	99.89	99.86	99.91	99.9	99.89
Be	<1	1	2	<1	<1	2	<1
Co	37.5	7.4	24.8	38.4	30	23.3	26.5
Cs	1.3	1.4	4.5	12.1	16.2	5.7	11.7
Ga	12.5	21.1	14.1	8.2	8.7	12	9.7
Hf	4.6	7.5	5.9	7.3	6.1	3.6	6.1
Nb	5.3	8	5.9	7.2	6.8	4.4	6.1
Rb	70.9	88.2	64.2	7.2	12.7	5.1	8.1
Sn	2	3	2	2	2	2	2
Sr	145.1	523.6	142.9	29.6	47.2	127.3	100.6
Ta	2.1	0.5	0.8	1.2	0.9	0.9	0.7
Th	5.9	9.8	7.5	8.7	7.5	11.2	7.8
U	1.8	2.6	1.8	2.7	2.1	3.7	2.4
V	53	44	54	11	15	33	28
W	263.1	30.3	313.7	587.2	263.2	337.4	270.7
Zr	183.6	281.6	204.7	272.9	207.2	135	221
Y	15.2	50.5	20.4	32.4	28.7	16.5	50.2
La	15.6	28.8	9.9	21.5	25.3	17.8	23.2
Ce	33.8	66.1	22	48	55.3	33.9	52.8
Pr	4.31	8.72	2.78	6.28	6.98	3.89	6.86
Nd	18	36.8	11.4	25.9	28.3	14.2	29.9
Sm	3.57	8.24	2.76	5.66	5.81	2.57	6.85
Eu	1.02	2.18	1.05	0.97	1.24	0.57	1.6
Gd	3.35	8.63	2.92	5.42	5.38	2.37	7.4
Tb	0.53	1.4	0.53	0.95	0.91	0.4	1.29
Dy	3.14	8.7	3.47	5.8	5.34	2.5	7.98
Ho	0.65	1.88	0.76	1.22	1.11	0.57	1.78
Er	2.04	5.48	2.36	3.64	3.2	1.89	5.4
Tm	0.3	0.79	0.35	0.55	0.46	0.29	0.81
Yb	2.16	4.99	2.27	3.56	2.99	2.14	5.45
Lu	0.34	0.79	0.35	0.54	0.45	0.36	0.86
TOT/C	0.04	0.05	0.16	0.03	0.04	<0.02	0.21
TOT/S	0.07	0.12	0.48	<0.02	0.05	0.03	0.06
Mo	0.5	0.3	3	0.7	1.1	1.7	1.2
Cu	8.1	7.2	8	6.5	2.4	3.8	6.6
Pb	8	15.1	11.3	16.1	16.7	15	11.7
Zn	72	89	61	56	66	36	72
Ni	7.6	3.4	7.1	1.2	1.7	1.9	3.5
As	8.8	6.5	19.8	3.1	2.9	3.3	11.4
Cd	<0.1	0.1	<0.1	0.2	0.1	<0.1	0.1
Sb	0.3	0.1	0.4	0.1	0.2	0.2	0.2
Bi	0.1	0.3	0.2	0.2	0.2	0.2	0.2
Ag	<0.1	<0.1	<0.1	<0.1	<0.1	<0.1	<0.1
Au	1.4	<0.5	<0.5	<0.5	0.5	<0.5	2.4
Hg	<0.01	0.02	0.04	<0.01	<0.01	<0.01	<0.01
Tl	<0.1	0.1	0.4	<0.1	<0.1	<0.1	<0.1
Se	<0.5	<0.5	<0.5	<0.5	<0.5	<0.5	<0.5
Eu/Eu*	0.901828	0.790437	1.1309	0.535481	0.678145	0.706178	0.68713
CIW	74.0636	76.2809	71.9343	66.4825	66.2169	66.9846	63.4806
CIA	62.9522	67.6724	63.8434	65.9963	65.0238	65.9708	62.6892
ICV	0.85977	0.92762	0.872325	0.66759	#VALUE!	0.71519	0.78125
LaCN	50.3226	92.9032	31.9355	69.3548	81.6129	57.4194	74.8387
YbCN	18.3077	42.2564	14.1538	29.0256	29.7949	13.1795	35.1282
LaCN/YbCN	4.86918	3.89114	2.94032	4.07167	5.70471	5.60778	2.86996
CN= chondrite normalised (Boynton, 1984)
	4.86918	3.89114	2.94032	4.07167	5.70471	5.60778	2.86996
